1 **The SARS-CoV-2 receptor, Angiotensin converting enzyme 2 (ACE2) is required for human**  
2 **endometrial stromal cell decidualization**

3 Sangappa B. Chadchan<sup>1, & #</sup>, Vineet K. Maurya<sup>1, & #</sup>, and Pooja Popli<sup>1, & #</sup> Ramakrishna  
4 Kommagani<sup>1 & \*</sup>

5 <sup>1</sup>Center for Reproductive Health Sciences, Department of Obstetrics and Gynecology  
6 Washington University School of Medicine, St. Louis, MO, 63110, USA.

7 **\*Correspondence to**

8 Ramakrishna Kommagani, PhD  
9 Department of Obstetrics & Gynecology  
10 Center for Reproductive Health Sciences  
11 Washington University School of Medicine  
12 BJC Institute of Health - 10th Floor, RM 10606  
13 425 S. Euclid Avenue Campus Box 8064  
14 St. Louis MO 63110  
15 Email: [kommagani@wustl.edu](mailto:kommagani@wustl.edu)  
16 Phone: (314) 273-1638  
17 Fax: (314) 747-0264

18 **Short title:** Role of ACE2 in decidualization

19 # These authors contributed equally and order of authors determined by coin toss.

20 The authors have declared that no conflict of interest exists relating to this work.

21 **Non-standard Abbreviations**

22 SARS-CoV-2- severe acute respiratory syndrome coronavirus

23 ACE2-Angiotensin converting enzyme 2

24 WT-Wild Type

25 HESC-Human Endometrial Stromal Cells

26 dpc- Days Post Coitum

27 E2-Estrogen

28 P4-Progesterone

29 **Abstract**

30 **STUDY QUESTION**

31 Is SARS-CoV-2 receptor, angiotensin-converting enzyme 2 (ACE 2) expressed in the human  
32 endometrium during the menstrual cycle, and does it participate in endometrial decidualization?

33 **SUMMARY ANSWER**

34 ACE2 protein is highly expressed in human endometrial stromal cells during the secretory phase  
35 and is essential for human endometrial stromal cell decidualization.

36 **WHAT IS KNOWN ALREADY**

37 ACE2 is expressed in numerous human tissues including the lungs, heart, intestine, kidneys and  
38 placenta. ACE2 is also the receptor by which SARS-CoV-2 enters human cells.

39 **STUDY DESIGN, SIZE, DURATION**

40 Proliferative (n = 9) and secretory (n = 6) phase endometrium biopsies from healthy reproductive-  
41 age women and primary human endometrial stromal cells from proliferative phase endometrium  
42 were used in the study.

43 **PARTICIPANTS/MATERIALS, SETTING, METHODS**

44 ACE2 expression and localization were examined by qRT-PCR, Western blot, and  
45 immunofluorescence in both human endometrial samples and mouse uterine tissue. The effect of  
46 ACE2 knockdown on morphological and molecular changes of human endometrial stromal cell  
47 decidualization were assessed. Ovariectomized mice were treated with estrogen or progesterone  
48 to determine the effects of these hormones on ACE2 expression.

49 **MAIN RESULTS AND THE ROLE OF CHANCE**

50 In human tissue, ACE2 protein is expressed in both endometrial epithelial and stromal cells in the  
51 proliferative phase of the menstrual cycle, and expression increases in stromal cells in the

52 secretory phase. The *ACE2* mRNA ( $P < 0.0001$ ) and protein abundance increased during primary  
53 human endometrial stromal cell (HESC) decidualization. HESCs transfected with *ACE2*-targeting  
54 siRNA were less able to decidualize than controls, as evidenced by a lack of morphology change  
55 and lower expression of the decidualization markers *PRL* and *IGFBP1* ( $P < 0.05$ ). In mice during  
56 pregnancy, *ACE2* protein was expressed in uterine epithelial and stromal cells increased through  
57 day six of pregnancy. Finally, progesterone induced expression of *Ace2* mRNA in mouse uteri  
58 more than vehicle or estrogen ( $P < 0.05$ ).

### 59 **LARGE SCALE DATA**

60 N/A.

### 61 **LIMITATIONS, REASONS FOR CAUTION**

62 Experiments assessing the function of *ACE2* in human endometrial stromal cell decidualization  
63 were *in vitro*. Whether SARS-CoV-2 can enter human endometrial stromal cells and affect  
64 decidualization have not been assessed.

### 65 **WIDER IMPLICATIONS OF THE FINDINGS**

66 Expression of *ACE2* in the endometrium allow SARS-CoV-2 to enter endometrial epithelial and  
67 stromal cells, which could impair *in vivo* decidualization, embryo implantation, and placentation.  
68 If so, women with COVID-19 may be at increased risk of early pregnancy loss.

### 69 **STUDY FUNDINGS/COMPETING INTEREST(S)**

70 This study was supported by National Institutes of Health / National Institute of Child Health and  
71 Human Development grants R01HD065435 and R00HD080742 to RK and Washington University  
72 School of Medicine start-up funds to RK. The authors declare that they have no conflicts of  
73 interest.

74 **Keywords:** SARS-CoV-2, Endometrium, Embryo implantation, Stromal cells, Decidualization,

## 75 **Introduction**

76           Although much of the focus during the severe acute respiratory syndrome coronavirus 2  
77 (SARS-CoV-2)/coronavirus disease 2019 (COVID-19) pandemic has been on respiratory  
78 symptoms, some reports suggest that SARS-CoV-2 and the related Middle East Respiratory  
79 Syndrome Coronavirus can cause pregnancy complications such as pre-term birth and  
80 miscarriages (Favre et al. 2020). Additionally, a few reports noted that pregnant women with  
81 COVID-19 had maternal vascular malperfusion and decidual arteriopathy in their placentas  
82 (Schwartz and Dhaliwal 2020; Shanes et al. 2020a), and a recent clinical case study reported a  
83 second-trimester miscarriage in a woman with COVID-19 (Baud et al. 2020). However, whether  
84 SARS-CoV-2 infects the uterus has not been determined.

85           It seems likely that SARS-CoV-2 could infect the uterus because its receptor, Angiotensin  
86 Converting Enzyme 2 (ACE2), is expressed fairly ubiquitously in human tissues such as the lungs,  
87 heart, intestine, kidneys, and placenta (Hamming et al. 2004; Harmer et al. 2002; Riviere et al.  
88 2005). Moreover, ACE2 functions by cleaving the vasoconstrictor angiotensin II to the vasodilator  
89 angiotensin (1-7). As a component of the renin–angiotensin system, ACE2 plays an important  
90 role in regulating maternal blood pressure during pregnancy. ACE2 is expressed in the rat uterus  
91 during mid- and late pregnancy (Merrill et al. 2002; Neves et al. 2008). In addition, ACE2 mRNA  
92 expression was noted in the uterus of both rats (Brosnihan et al. 2012) and humans (Vaz-Silva et  
93 al. 2009), in which its expression may be higher in the secretory phase than in the proliferative  
94 phase of the menstrual cycle (Vaz-Silva et al. 2009).

95           During the secretory phase, the uterine stromal cells prepare for embryo implantation by  
96 undergoing a progesterone-mediated differentiation process called decidualization. In this  
97 process, the stromal cells divide, change from a fibroblastic to an epithelioid morphology, and  
98 change their pattern of gene expression. Decidualization is essential for trophoblast invasion and  
99 placentation (Carson et al. 2000; Norwitz et al. 2001; Wilcox et al. 1999), and defects in this  
100 process may underlie early pregnancy loss in some women. Given the important function of the

101 uterine stroma and the possibility that SARS-CoV-2 could infect the uterus, our goal here was to  
102 determine whether ACE2 is expressed in endometrial stromal cells, is regulated by progesterone,  
103 and is required for decidualization.

## 104 Results and Discussion

105 We first sought to determine whether ACE2 is expressed in the endometrium and whether  
106 its expression differs according to the phase of the menstrual cycle. Thus, we obtained  
107 endometrial biopsies from women during the proliferative or secretory phase of the menstrual  
108 cycles and performed immunofluorescence with an ACE2-specific antibody. In the proliferative  
109 phase, ACE2 was highly expressed in epithelial cells than in stromal cells (**Fig. 1A**). However, in  
110 the secretory phase, ACE2 expression was increased in the stromal cells (**Fig. 1A**). Thus, we  
111 wondered whether ACE2 expression increased during *in vitro* decidualization of human  
112 endometrial stromal cells (HESCs). We isolated primary HESCs, exposed them to decidualizing  
113 conditions, and confirmed that expression of the decidualization markers Prolactin (*PRL*) and  
114 Insulin-like growth factor-binding protein-1 (*IGFBP1*) increased over six days. *ACE2* mRNA also  
115 increased over this time (**Fig. 2A**). Consistent with this finding, ACE2 protein abundance  
116 increased during decidualization, as shown by both immunoblotting (**Fig. 2B**) and  
117 immunofluorescence (**Fig. 2C**). As expected, ACE2 protein predominantly localized in the  
118 cytoplasm and cell membrane of decidualized HESCs.

119 Next, we wondered whether ACE2 was required for primary HESC decidualization. To  
120 answer this question, we transfected HESCs with control or *ACE2*-targeting siRNAs and then  
121 exposed the cells to decidualization conditions. HESCs transfected with control siRNA changed  
122 from fibroblastic to epithelioid morphology (**Fig. 3A**) and had increased expression of the  
123 decidualization markers *PRL* and *IGFBP1* (**Fig. 3B**). In contrast, HESCs transfected with *ACE2*-  
124 targeting siRNA did not show a morphology change over six days (**Fig. 3A**) and expressed  
125 significantly less *PRL*, *IGFBP1*, and *ACE2* than control cells (**Fig. 3B-C**). These results  
126 demonstrate that ACE2 is essential for endometrial stromal cell decidualization.

127 Finally, we examined the expression of ACE2 in the endometrium during early pregnancy  
128 in mice. We mated female wild-type mice with males of proven fertility and then stained their uteri

129 with an ACE2-specific antibody at different days in early pregnancy. In days one through four,  
130 ACE2 localized to the cytoplasm and cell surface of epithelial and stromal cells. However,  
131 beginning on day three, strong ACE2 staining was seen in the cytoplasm of stromal cells. This  
132 staining was evident at least through day six, which is when robust decidualization occurs (**Fig.**  
133 **4**). Given this change in ACE2 abundance during pregnancy, we wondered whether ACE2  
134 expression was regulated by steroid hormones. To test this, we ovariectomized six-week-old  
135 mice, waited two weeks, treated the mice with either estrogen or progesterone for six hours, and  
136 then collected the uteri (**Fig. 5A**). Uteri from progesterone-treated mice expressed significantly  
137 more *Ace2* mRNA than uteri from vehicle-treated mice, which expressed significantly more *Ace2*  
138 mRNA than uteri from estrogen-treated (**Fig. 5B**). Consistent with this, immunofluorescence  
139 revealed that uteri from progesterone-treated mice had significantly more ACE2 protein in stromal  
140 cells than did uteri from vehicle- or estrogen-treated mice (**Fig. 5C**).

141 Together, our findings suggest that ACE2 expression in the endometrial stroma is  
142 promoted by progesterone in both humans and mice. Moreover, we show that ACE2 is required  
143 for human stromal cell decidualization. Given the high ACE2 expression in the human  
144 endometrium, SARS-CoV-2 may be able to enter endometrial stromal cells and elicit pathological  
145 manifestations in women with COVID-19. If so, women with COVID-19 may be at increased risk  
146 of early pregnancy loss. As more data become available, epidemiologists and obstetricians should  
147 focus on this important issue and determine whether women who intend to get pregnant should  
148 undergo additional health screenings during the COVID-19 pandemic.



## 149 **Materials and Methods**

### 150 **Human ethical approval and endometrial stromal cell isolation**

151 Informed consent was obtained in accordance with a protocol approved by the Washington  
152 University in St. Louis Institutional Review Board (IRB ID #: 201612127). Additionally, all work  
153 involving human subjects followed the guidelines of the World Medical Association Declaration of  
154 Helsinki. Human endometrial biopsies of healthy, reproductive-age women were collected during  
155 the proliferative phase (days 9 to 12) and secretory phase (days 14 to 26) of the menstrual cycle.  
156 HESCs were isolated as described previously (Camden et al. 2017; Michalski et al. 2018). Briefly,  
157 proliferative phase endometrial biopsies were minced with sterile scissors and then digested in  
158 DMEM/F12 medium containing 2.5 mg/ml collagenase (Sigma-Aldrich, Saint Louis, MO, USA)  
159 and 0.5 mg/ml DNase I (Sigma-Aldrich) for 1.5 hours at 37 °C. Then, detached cells were  
160 centrifuged at 800g for 2.5 min. collected, and layered over a Ficoll-Paque reagent layer and  
161 centrifuged for 30 min. at 400g (GE Healthcare Biosciences, Pittsburgh, PA) to remove  
162 lymphocytes. The HESC fraction from the top layer was collected and filtered through a 40 µm  
163 nylon cell strainer (BD Biosciences, Franklin Lakes, NJ). HESCs collected from the filtrate were  
164 suspended in DMEM/F-12 media containing 10% FBS, 100 U/ml penicillin, and 0.1 mg/ml  
165 streptomycin at 37 °C with 5% CO<sub>2</sub>. Independent HESC lines isolated from three patients were  
166 used for each experiment. Represented data are from a single patient with three technical  
167 replicates.

### 168 **Transfection and HESC decidualization**

169 HESCs were grown in a six-well culture plate to 60%–70% confluence and transfected with 60  
170 pmol of non-targeting siRNA (D-001810-10-05) or siRNAs targeting *ACE2* (L-005755-00-0005)  
171 (GE Healthcare Dharmacon Inc., Lafayette, CO) in Lipofectamine 2000 reagent (Invitrogen  
172 Corporation, Carlsbad, USA) as described previously (Camden et al. 2017). After 48 hours,  
173 HESCs were decidualized by culturing in EPC (Estrogen, Medroxy Progesterone Acetate and

174 cAMP) medium (1x Opti-MEM reduced-serum media containing 2% FBS, 100 nM estradiol [cat.  
175 no. E1024, Sigma-Aldrich], 10  $\mu$ M Medroxyprogesterone17-acetate [cat. no. M1629, Sigma-  
176 Aldrich], and 50  $\mu$ M 8-Bromoadenosine 3',5'-cyclic monophosphate sodium salt [cat. no. B7880,  
177 Sigma-Aldrich]). The EPC medium was changed every 48 hours until day six, when the cells were  
178 harvested for RNA isolation with the total RNA isolation kit (Invitrogen/Life Technologies, Grand  
179 Island, NY) or for protein isolation.

### 180 **Quantitative real-time PCR**

181 Total RNA was extracted from uterine tissues or HESCs by using the total RNA isolation kit  
182 (Invitrogen/Life Technologies) according to the manufacturer's instructions. RNA was quantified  
183 with a Nano-Drop 2000 (Thermo Scientific, Waltham, MA, USA). Then, 1  $\mu$ g of RNA was reverse  
184 transcribed with the High-Capacity cDNA Reverse Transcription Kit (Thermo Scientific, Waltham,  
185 MA, USA). The amplified cDNA was diluted to 10 ng/ $\mu$ l, and quantitative PCR was performed with  
186 primers specified in **Table S1** and Fast Taqman 2X mastermix (Applied Biosystems/Life  
187 Technologies, Grand Island, NY) on a 7500 Fast Real-time PCR system (Applied Biosystems/Life  
188 Technologies). Ribosomal RNA (18S) was used as an internal control for gene specific primers.  
189 (Camden et al. 2017; Kommagani et al. 2013; Kommagani et al. 2016).

### 190 **SDS-PAGE and Western blotting**

191 Protein extracts were prepared from HESCs as described previously (Oestreich et al. 2020).  
192 Briefly, total proteins were extracted by homogenizing cells in RIPA lysis buffer (cat. no. 9806,  
193 Cell Signaling Technology) and centrifuging at 14,000 g for 15 minutes at 4 °C. The supernatants  
194 were collected and protein was quantified with the BCA Protein Assay kit according to the  
195 manufacturer's instructions (Pierce BCA protein assay kit, cat no. 23227). Lysates containing 40  
196  $\mu$ g of protein were loaded on a 4-15% SDS-PAGE gel, separated with 1x Tris-Glycine Running  
197 Buffer, and transferred to PVDF membranes on a wet electro-blotting system (all from Bio-Rad,  
198 USA), all according to the manufacturer's directions. The PVDF membranes were washed,

199 blocked for 1 hour in 5% non-fat milk in TBS-T (Bio-Rad, USA), and incubated with primary  
200 antibodies anti-ACE2 (1:1000, ab15348, Abcam) and anti-GAPDH (1:3000, #2118S Cell  
201 Signaling Technology, USA) in 5% BSA in TBS-T overnight at 4°C. Then, blots were probed with  
202 anti-Rabbit IgG conjugated with horseradish peroxidase (1:5000, #7074, Cell Signaling  
203 Technology) in 5% BSA in TBS-T for 1 hour at room temperature. Signal was detected by using  
204 the Immobilon Western Chemiluminescent HRP Substrate (Millipore, MA, USA), and blot images  
205 were collected with a Bio-Rad ChemiDoc imaging system (Kommagani et al. 2016).

## 206 **Immunofluorescence**

207 Formalin-fixed, paraffin-embedded sections (5 µm) of human endometrium and mouse uterus  
208 were deparaffinized in xylene, rehydrated in an ethanol gradient, and then boiled in antigen  
209 retrieval citrate buffer (Vector Laboratories Inc., CA, USA). Subsequently, sections were blocked  
210 with 2.5% goat serum in PBS (Vector laboratories) for one hour at room temperature, and then  
211 incubated overnight at 4°C with anti-ACE2 antibody (1:200, ab15348, Abcam) or normal rabbit  
212 IgG (#2729, Cell Signaling Technology). Then, sections were washed with PBS, incubated with  
213 Alexa Fluor 488-conjugated secondary antibody (Life Technologies) for one hour at room  
214 temperature, washed three times with PBS, and mounted with ProLong Gold Antifade Mountant  
215 with DAPI (cat. no. P36962 Thermo Scientific). Immunofluorescence images were captured on a  
216 confocal microscope (Leica DMI 4000B).

## 217 **Immunocytochemistry**

218 HESCs were grown on poly-L-Lysine coated coverslips in 12-well plates and allowed to  
219 decidualize for six days in EPC media as described above. Then, cells were fixed with 4%  
220 paraformaldehyde (Alfa Aesar, USA) in PBS) for 20 min. at room temperature, washed with PBS,  
221 and permeabilized with 0.2% Triton X-100 (Sigma Aldrich, USA) in PBS for 20 min. at room  
222 temperature. Then, cells were washed, blocked with 2.5% normal goat-serum (Vector  
223 laboratories) in PBS for 1 h at room temperature, and incubated overnight at 4°C with anti-ACE2

224 antibody (ab15348, Abcam, 1:200) in 2.5% normal goat serum. Cells were washed and incubated  
225 with Alexa Fluor 488-conjugated secondary antibodies (Life Technologies) for one hour at room  
226 temperature and mounted with ProLong Gold Antifade Mountant with DAPI (Thermo Scientific).  
227 Images were captured on a confocal microscope (Leica DMI 4000B).

## 228 **Mice and hormone treatments**

229 All mouse experimental procedures followed a protocol approved by the Washington University  
230 in St. Louis Institutional Animal Care and Use Committee (Protocol Number 20191079). CD1 wild-  
231 type mice (Charles River, Saint Louis, Missouri) were maintained on a 12-h light:12-h dark cycle.  
232 Sexually mature (8-week-old) CD1 females were mated to fertile wild-type males, and copulation  
233 was confirmed by the presence of vaginal plug on the following morning, designated as 1 day  
234 post-coital (dpc). Mice were euthanized, and uteri were collected on 1, 2, 3, 4, 5, and 6 dpc. To  
235 determine the uterine estrogen or progesterone responses, six-week-old CD1 mice were  
236 bilaterally ovariectomized, rested for two weeks to allow the endogenous ovarian-derived steroid  
237 hormones to dissipate, and then subcutaneously injected with 100  $\mu$ l sesame oil (vehicle control),  
238 1 mg progesterone, or 100 ng estradiol (Sigma-Aldrich) in 100  $\mu$ l sesame oil. Six hours later, mice  
239 were euthanized, uterine tissues were collected and fixed in 4% paraformaldehyde, and RNA was  
240 isolated and processed for qRT-PCR (Kommagani et al. 2016).

## 241 **Statistical analyses**

242 A two-tailed paired Student t-test was used to analyze experiments with two experimental groups,  
243 and analysis of variance by non-parametric alternatives was used for multiple comparisons to  
244 analyze experiments containing more than two groups.  $P < 0.05$  was considered significant. All  
245 data are presented as mean  $\pm$  SEM. GraphPad Prism 8 software was used for all statistical  
246 analyses.

247 **Acknowledgments**

248 We thank Dr. Deborah J. Frank (Department of Obstetrics and Gynecology, Washington  
249 University) for assistance with manuscript editing.

250 **Author contribution statement**

251 RK conceived the project, supervised the work, analyzed the data, and wrote the manuscript.  
252 SBC, VKM, and PP, conducted the studies and wrote the manuscript. All authors reviewed and  
253 approved the final version of the manuscript.

254 **Funding**

255 This work was funded, in part, by National Institutes of Health/National Institute of Child Health  
256 and Human Development grants R00HD080742 and RO1HD065435 to RK and Washington  
257 University School of Medicine start-up funds to RK.

258 **Declaration of Interest**

259 The authors have no conflicts of interest to declare.

## 260 References

- 261 Ali, M., et al. (2020), 'The role of asymptomatic class, quarantine and isolation in the transmission of  
262 COVID-19', *J Biol Dyn*, 14 (1), 389-408.
- 263 AlSaad, A. M. S., et al. (2020), 'Renin angiotensin system blockage by losartan neutralize  
264 hypercholesterolemia-induced inflammatory and oxidative injuries', *Redox Rep*, 25 (1), 51-58.
- 265 Baud, D., et al. (2020), 'Second-Trimester Miscarriage in a Pregnant Woman With SARS-CoV-2 Infection',  
266 *JAMA*.
- 267 Brosnihan, K. B., et al. (2012), 'Decidualized pseudopregnant rat uterus shows marked reduction in Ang II  
268 and Ang-(1-7) levels', *Placenta*, 33 (1), 17-23.
- 269 Camden, A. J., et al. (2017), 'Growth regulation by estrogen in breast cancer 1 (GREB1) is a novel  
270 progesterone-responsive gene required for human endometrial stromal decidualization', *Mol  
271 Hum Reprod*, 23 (9), 646-53.
- 272 Carson, D. D., et al. (2000), 'Embryo implantation', *Dev Biol*, 223 (2), 217-37.
- 273 Donoghue, M., et al. (2000), 'A novel angiotensin-converting enzyme-related carboxypeptidase (ACE2)  
274 converts angiotensin I to angiotensin 1-9', *Circ Res*, 87 (5), E1-9.
- 275 Favre, G., et al. (2020), '2019-nCoV epidemic: what about pregnancies?', *Lancet*, 395 (10224), e40.
- 276 Fernandez, L. A., Twickler, J., and Mead, A. (1985), 'Neovascularization produced by angiotensin II', *J Lab  
277 Clin Med*, 105 (2), 141-5.
- 278 Gellersen, B. and Brosens, J. J. (2014), 'Cyclic decidualization of the human endometrium in reproductive  
279 health and failure', *Endocr Rev*, 35 (6), 851-905.
- 280 Goldenberg, I., et al. (2001), 'Angiotensin II-induced apoptosis in rat cardiomyocyte culture: a possible role  
281 of AT1 and AT2 receptors', *J Hypertens*, 19 (9), 1681-9.
- 282 Hamming, I., et al. (2004), 'Tissue distribution of ACE2 protein, the functional receptor for SARS  
283 coronavirus. A first step in understanding SARS pathogenesis', *J Pathol*, 203 (2), 631-7.
- 284 Harmer, D., et al. (2002), 'Quantitative mRNA expression profiling of ACE 2, a novel homologue of  
285 angiotensin converting enzyme', *FEBS Lett*, 532 (1-2), 107-10.
- 286 Jing, Y., et al. (2020), 'Potential influence of COVID-19/ACE2 on the female reproductive system', *Mol Hum  
287 Reprod*.
- 288 Khan, S., et al. (2020), 'Emergence of a Novel Coronavirus, Severe Acute Respiratory Syndrome  
289 Coronavirus 2: Biology and Therapeutic Options', *J Clin Microbiol*, 58 (5).
- 290 Kommagani, R., et al. (2016), 'The Promyelocytic Leukemia Zinc Finger Transcription Factor Is Critical for  
291 Human Endometrial Stromal Cell Decidualization', *PLoS Genet*, 12 (4), e1005937.
- 292 Kommagani, R., et al. (2013), 'Acceleration of the glycolytic flux by steroid receptor coactivator-2 is  
293 essential for endometrial decidualization', *PLoS Genet*, 9 (10), e1003900.
- 294 Le Noble, F. A., et al. (1993), 'Evidence for a novel angiotensin II receptor involved in angiogenesis in chick  
295 embryo chorioallantoic membrane', *Am J Physiol*, 264 (2 Pt 2), R460-5.
- 296 Merrill, D. C., et al. (2002), 'Angiotensin-(1-7) in normal and preeclamptic pregnancy', *Endocrine*, 18 (3),  
297 239-45.
- 298 Michalski, S. A., et al. (2018), 'Isolation of Human Endometrial Stromal Cells for In Vitro Decidualization', *J  
299 Vis Exp*, (139).
- 300 Muus, Christoph, et al. (2020), 'Integrated analyses of single-cell atlases reveal age, gender, and smoking  
301 status associations with cell type-specific expression of mediators of SARS-CoV-2 viral entry and  
302 highlights inflammatory programs in putative target cells', *bioRxiv*, 2020.04.19.049254.
- 303 Nakashima, H., et al. (2006), 'Angiotensin II regulates vascular and endothelial dysfunction: recent topics  
304 of Angiotensin II type-1 receptor signaling in the vasculature', *Curr Vasc Pharmacol*, 4 (1), 67-78.
- 305 Neves, L. A., et al. (2008), 'ACE2 and ANG-(1-7) in the rat uterus during early and late gestation', *Am J  
306 Physiol Regul Integr Comp Physiol*, 294 (1), R151-61.

- 307 Norwitz, E. R., Schust, D. J., and Fisher, S. J. (2001), 'Implantation and the survival of early pregnancy', *N*  
308 *Engl J Med*, 345 (19), 1400-8.
- 309 Oestreich, A. K., et al. (2020), 'The Autophagy Gene Atg16L1 is Necessary for Endometrial Decidualization',  
310 *Endocrinology*, 161 (1).
- 311 Okada, H., Tsuzuki, T., and Murata, H. (2018), 'Decidualization of the human endometrium', *Reprod Med*  
312 *Biol*, 17 (3), 220-27.
- 313 Okada, H., et al. (2014), 'Regulation of decidualization and angiogenesis in the human endometrium: mini  
314 review', *J Obstet Gynaecol Res*, 40 (5), 1180-7.
- 315 Peach, M. J. (1977), 'Renin-angiotensin system: biochemistry and mechanisms of action', *Physiol Rev*, 57  
316 (2), 313-70.
- 317 Qin, S., et al. (2013), '[Expression and significance of ACE2-Ang-(1-7)-Mas axis in the endometrium of  
318 patients with polycystic ovary syndrome]', *Zhonghua Yi Xue Za Zhi*, 93 (25), 1989-92.
- 319 Riviere, G., et al. (2005), 'Angiotensin-converting enzyme 2 (ACE2) and ACE activities display tissue-specific  
320 sensitivity to undernutrition-programmed hypertension in the adult rat', *Hypertension*, 46 (5),  
321 1169-74.
- 322 Santos, R. A., et al. (2003), 'Angiotensin-(1-7) is an endogenous ligand for the G protein-coupled receptor  
323 Mas', *Proc Natl Acad Sci U S A*, 100 (14), 8258-63.
- 324 Schaller, T., et al. (2020), 'Postmortem Examination of Patients With COVID-19', *JAMA*.
- 325 Schwartz, D. A. and Dhaliwal, A. (2020), 'INFECTIONS IN PREGNANCY WITH COVID-19 AND OTHER  
326 RESPIRATORY RNA VIRUS DISEASES ARE RARELY, IF EVER, TRANSMITTED TO THE FETUS:  
327 EXPERIENCES WITH CORONAVIRUSES, HPIV, hMPV RSV, AND INFLUENZA', *Arch Pathol Lab Med*.
- 328 Shanes, E. D., et al. (2020a), 'Placental pathology in COVID-19', *medRxiv*.  
329 --- (2020b), 'Placental Pathology in COVID-19', *Am J Clin Pathol*, 154 (1), 23-32.
- 330 Shang, J., et al. (2020), 'Cell entry mechanisms of SARS-CoV-2', *Proc Natl Acad Sci U S A*, 117 (21), 11727-  
331 34.
- 332 Tipnis, S. R., et al. (2000), 'A human homolog of angiotensin-converting enzyme. Cloning and functional  
333 expression as a captopril-insensitive carboxypeptidase', *J Biol Chem*, 275 (43), 33238-43.
- 334 Vaz-Silva, J., et al. (2009), 'The vasoactive peptide angiotensin-(1-7), its receptor Mas and the angiotensin-  
335 converting enzyme type 2 are expressed in the human endometrium', *Reprod Sci*, 16 (3), 247-56.
- 336 Verdecchia, P., et al. (2020), 'The pivotal link between ACE2 deficiency and SARS-CoV-2 infection', *Eur J*  
337 *Intern Med*, 76, 14-20.
- 338 Vickers, C., et al. (2002), 'Hydrolysis of biological peptides by human angiotensin-converting enzyme-  
339 related carboxypeptidase', *J Biol Chem*, 277 (17), 14838-43.
- 340 Wang, H. and Dey, S. K. (2006), 'Roadmap to embryo implantation: clues from mouse models', *Nat Rev*  
341 *Genet*, 7 (3), 185-99.
- 342 Wilcox, A. J., Baird, D. D., and Weinberg, C. R. (1999), 'Time of implantation of the conceptus and loss of  
343 pregnancy', *N Engl J Med*, 340 (23), 1796-9.
- 344 Wrapp, D., et al. (2020), 'Cryo-EM structure of the 2019-nCoV spike in the prefusion conformation',  
345 *Science*, 367 (6483), 1260-63.
- 346 Yamada, T., Horiuchi, M., and Dzau, V. J. (1996), 'Angiotensin II type 2 receptor mediates programmed cell  
347 death', *Proc Natl Acad Sci U S A*, 93 (1), 156-60.
- 348 Yuan, J., et al. (2018), 'Tridimensional visualization reveals direct communication between the embryo  
349 and glands critical for implantation', *Nat Commun*, 9 (1), 603.
- 350 Yuan, J., et al. (2019), 'Primary decidual zone formation requires Scribble for pregnancy success in mice',  
351 *Nat Commun*, 10 (1), 5425.
- 352 Zhang, C., et al. (2020), 'Impact of population movement on the spread of 2019-nCoV in China', *Emerg*  
353 *Microbes Infect*, 9 (1), 988-90.

354 Zhou, P., et al. (2020), 'A pneumonia outbreak associated with a new coronavirus of probable bat origin',  
355 *Nature*, 579 (7798), 270-73.

356



357 **Figures**

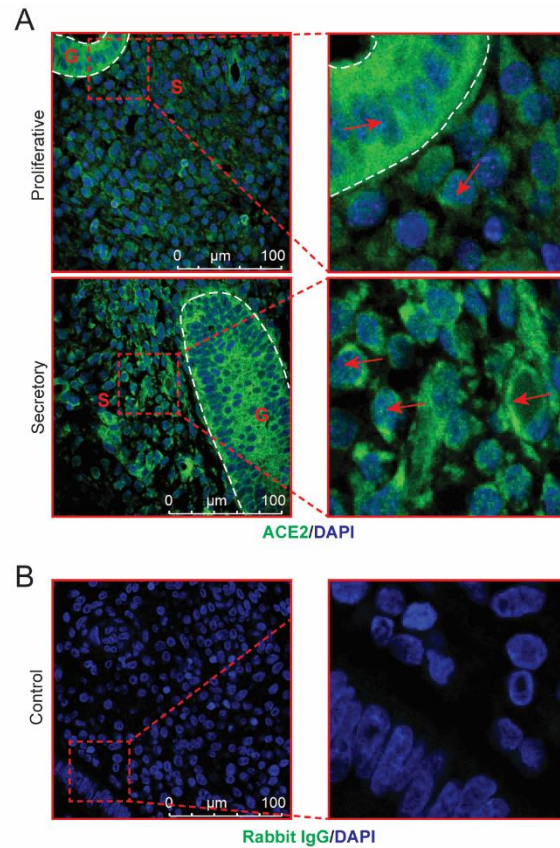

358

359 **Figure 1: ACE2 protein expression is elevated in stromal cells of the secretory phase**  
360 **human endometrium. (A)** Representative images showing immunolocalization of ACE2 (green)  
361 in proliferative (n=9) and secretory (n=6) phase endometrium. Blue stain is DAPI. G, gland; S,  
362 stroma. Red arrows indicate ACE2-positive cells, and the dashed white line marks the epithelium.  
363 **(B)** Rabbit IgG was used as an isotype control for staining. Scale bar: 100 μm.

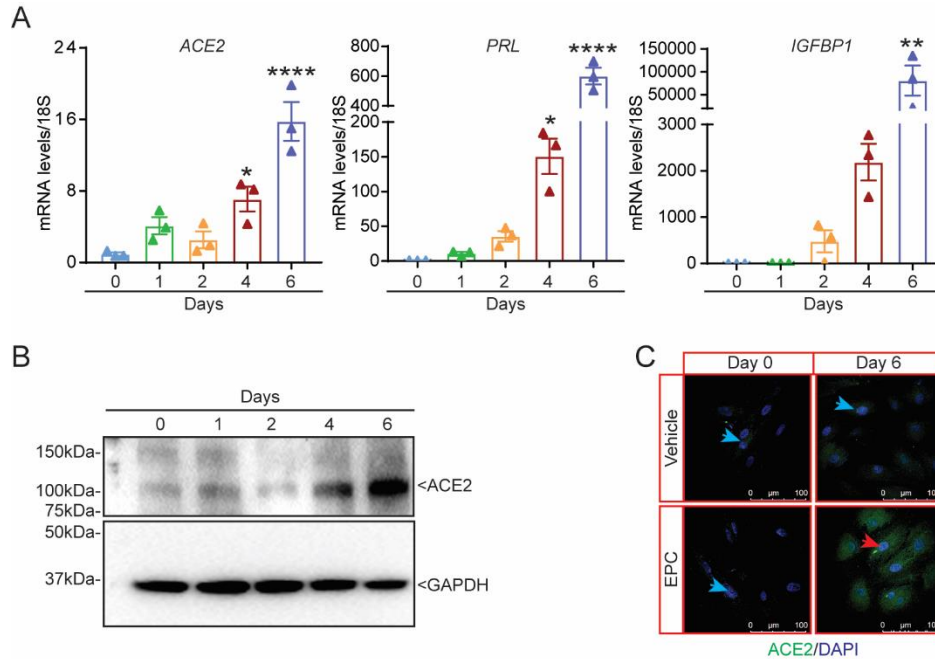

364

365 **Figure 2: ACE2 is upregulated during *in vitro* human endometrial stromal cell**  
366 **decidualization. (A)** Abundances of *ACE2*, *PRL*, and *IGFBP1* transcripts from human  
367 endometrial stromal cells (HESCs) induced to decidualize for the indicated numbers of  
368 days. Representative data from three replicates (n=3) from one subject sample are shown as  
369 mean  $\pm$  SEM. The experiment were repeated three times. \* $P < 0.05$ , \*\* $P < 0.01$ , and \*\*\*\* $P <$   
370 0.0001. **(B)** Western blot of ACE2 from HESCs cultured in decidualization media for the indicated  
371 numbers of days; GAPDH was used as an internal loading control. **(C)** Immunofluorescence  
372 detection of ACE2 (green) in HESCs cultured with vehicle or decidualization media (EPC) for the  
373 indicated numbers of days. Blue stain is DAPI. Red arrowhead indicates a decidualized cell, and  
374 blue arrowheads indicate non-decidualized cells. Scale bar: 100  $\mu$ m.

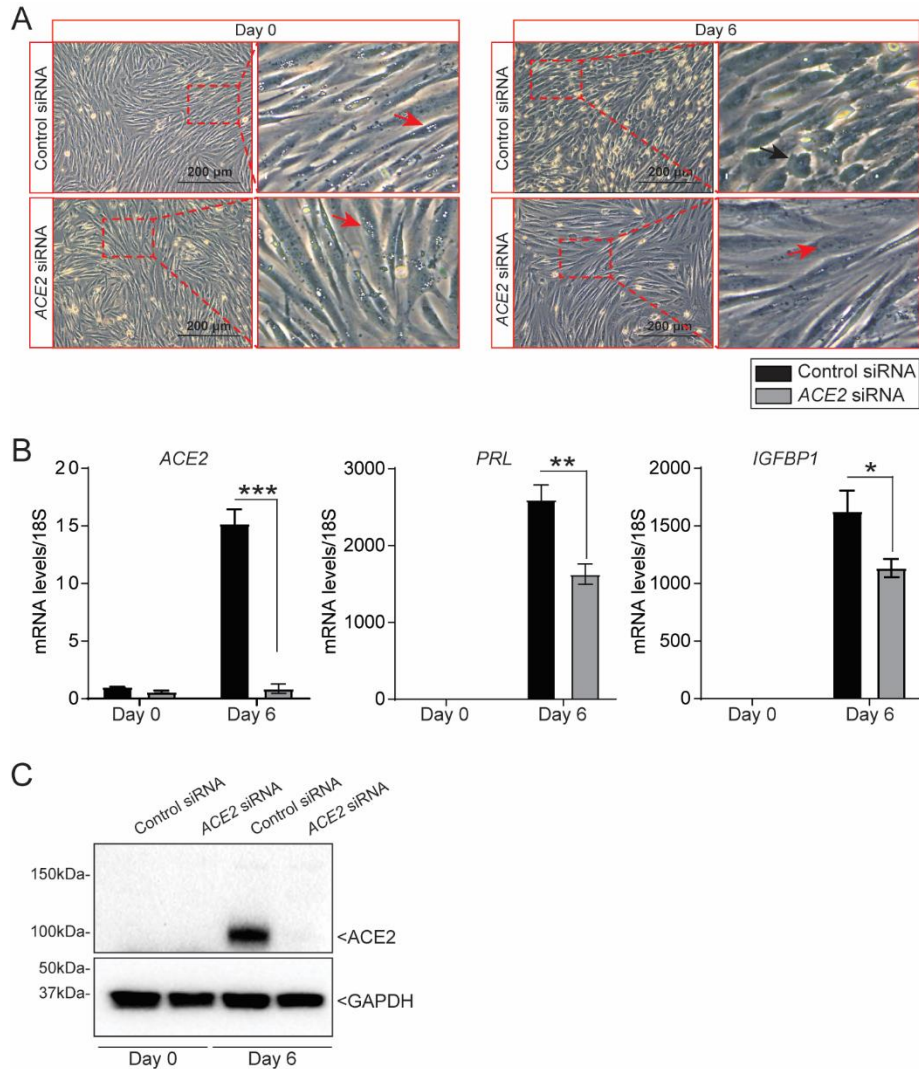

375

376 **Figure 3: ACE2 is critical for human endometrial stromal cell decidualization.**

377 (A) Morphology of human endometrial stromal cells (HESCs) transfected with control  
378 or ACE2 siRNA at day 0 or after six days of culture in decidualization conditions. Red arrows  
379 indicate non-decidualized cells, and the black arrow indicates a decidualized cell. Scale bar: 200  
380  $\mu$ m. (B) Abundances of ACE2, PRL, and IGFBP1 transcripts in HESCs transfected with control  
381 or ACE2 siRNAs and induced to decidualize for the indicated numbers of days. (C) Western blot  
382 of ACE2 protein from HESCs transfected with control or ACE2 siRNA; GAPDH was used as an  
383 internal loading control. Representative data from three replicates from one subject sample are  
384 shown as mean  $\pm$  SEM. The experiment was repeated three times; \* $P < 0.05$ , \*\* $P < 0.01$ , and  
385 \*\*\* $P < 0.001$ .

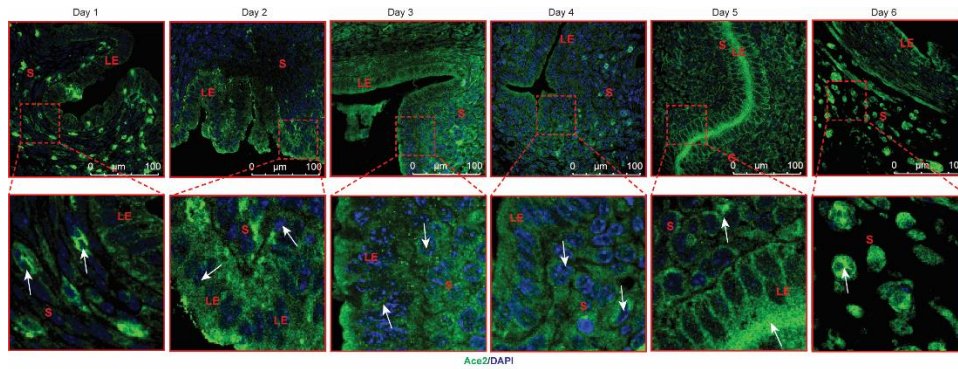

386

387 **Figure 4: ACE2 protein expression in the mouse uterine stroma increases during early**  
388 **pregnancy.** Shown are representative images of immunocytochemical localization of ACE2 in  
389 mouse uteri on the indicated days of pregnancy. LE, luminal epithelium; S, stroma; G, glands.  
390 Scale bar: 100 μm. White arrows indicate ACE2-positive cells. Samples from at least five mice  
391 were examined. All uteri were collected between 9:00 am and 10:00 am on the indicated days of  
392 pregnancy.

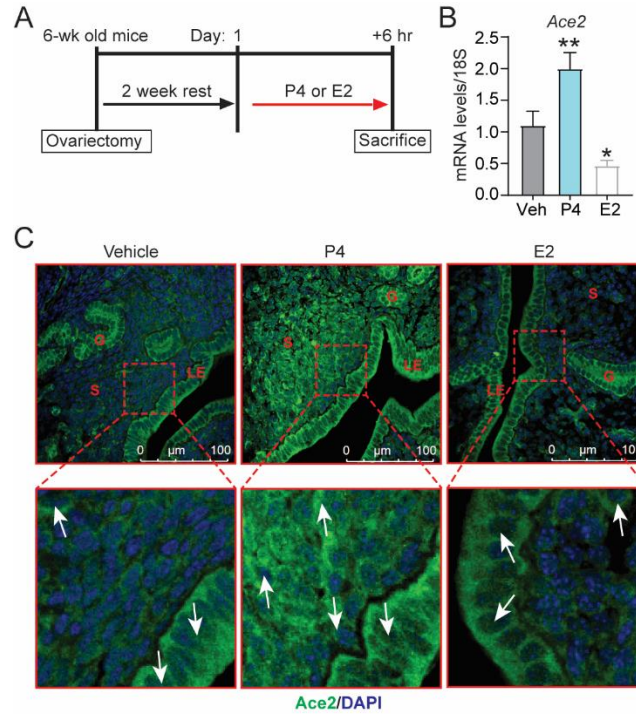

393

394 **Figure 5: ACE2 expression in the mouse uterus is upregulated by progesterone**  
395 **exposure.** (A) Experimental protocol and hormone treatment. E2, estrogen; P4, progesterone.  
396 (B) Relative *Ace2* mRNA abundance after six hours of estrogen or progesterone treatment. Data  
397 are presented as mean  $\pm$  SEM (n=5 mice per group). \* $P$ < 0.05, \*\* $P$ < 0.01. (C) Representative  
398 cross-sectional images of uteri stained for ACE2 (green) and DNA (blue); LE, luminal epithelium;  
399 S, stroma; G, glands, scale bar: 100  $\mu$ m.

400
