# Supplementary material for: The SARS-CoV-2 receptor, Angiotensin converting enzyme 2 (ACE2) is required for human endometrial stromal cell decidualization
Source: bioRxiv or medRxiv preprint supplement (doi:10.1101/2020.06.23.168252), 2020-06-24
Supplement: Supplementary file [file media-1.pdf]

Table S1. List of TaqMan probes

| <b>Gene name</b> | <b>Species</b> | <b>Application, Chemistry</b> | <b>Company</b> | <b>Cat. No.</b> |
|------------------|----------------|-------------------------------|----------------|-----------------|
| <i>PRL</i>       | Human          | qPCR, Taqman                  | ABI            | Hs00168730_m1   |
| <i>IGFBP1</i>    | Human          | qPCR, Taqman                  | ABI            | Hs00236877_m1   |
| <i>ACE2</i>      | Human          | qPCR, Taqman                  | ABI            | Hs01085333_m1   |
| <i>Ace2</i>      | Mouse          | qPCR, Taqman                  | ABI            | Mm01159006_m1   |
| <i>18S</i>       | Mouse          | qPCR, Taqman                  | ABI            | 4318839         |

ABI-applied biosystems
